# Supplementary material
Source: PubMed Central journal article supplement (PMC5882527)
Supplement: NIHMS931204-supplement-1.pdf [file NIHMS931204-supplement-1.pdf]

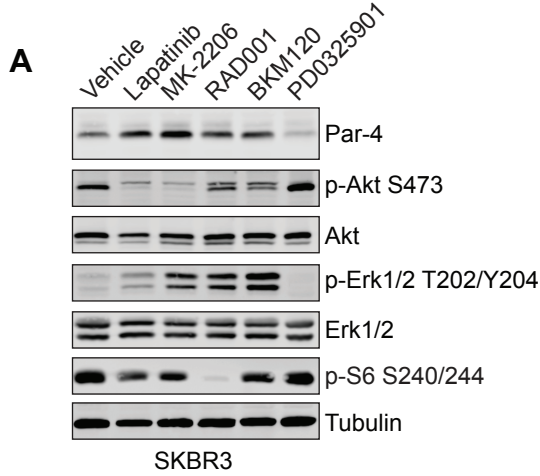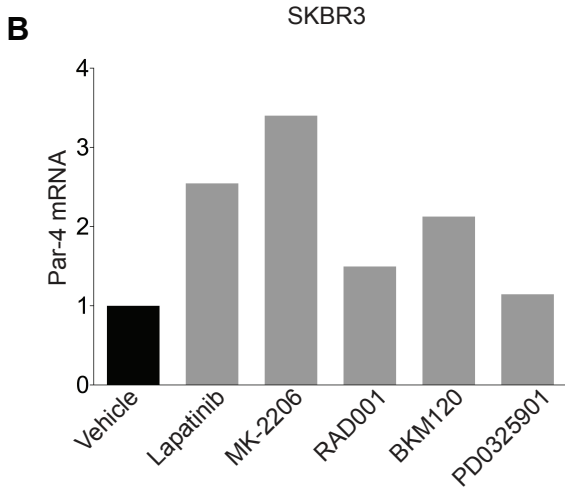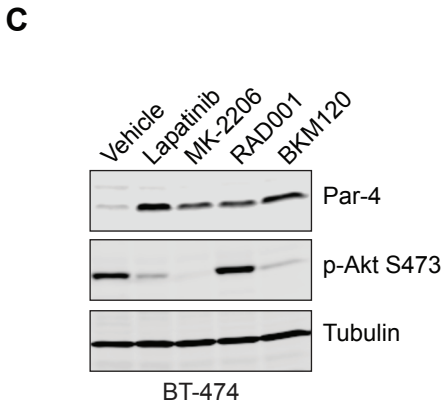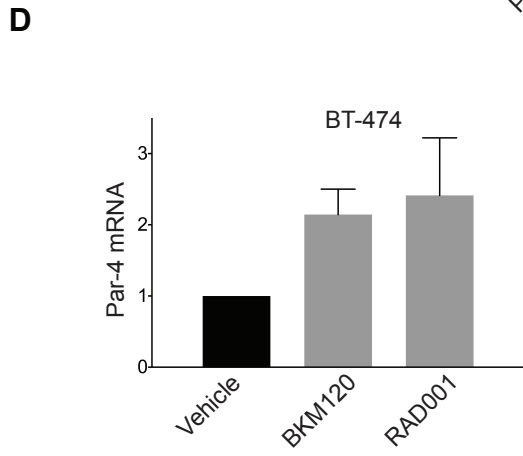

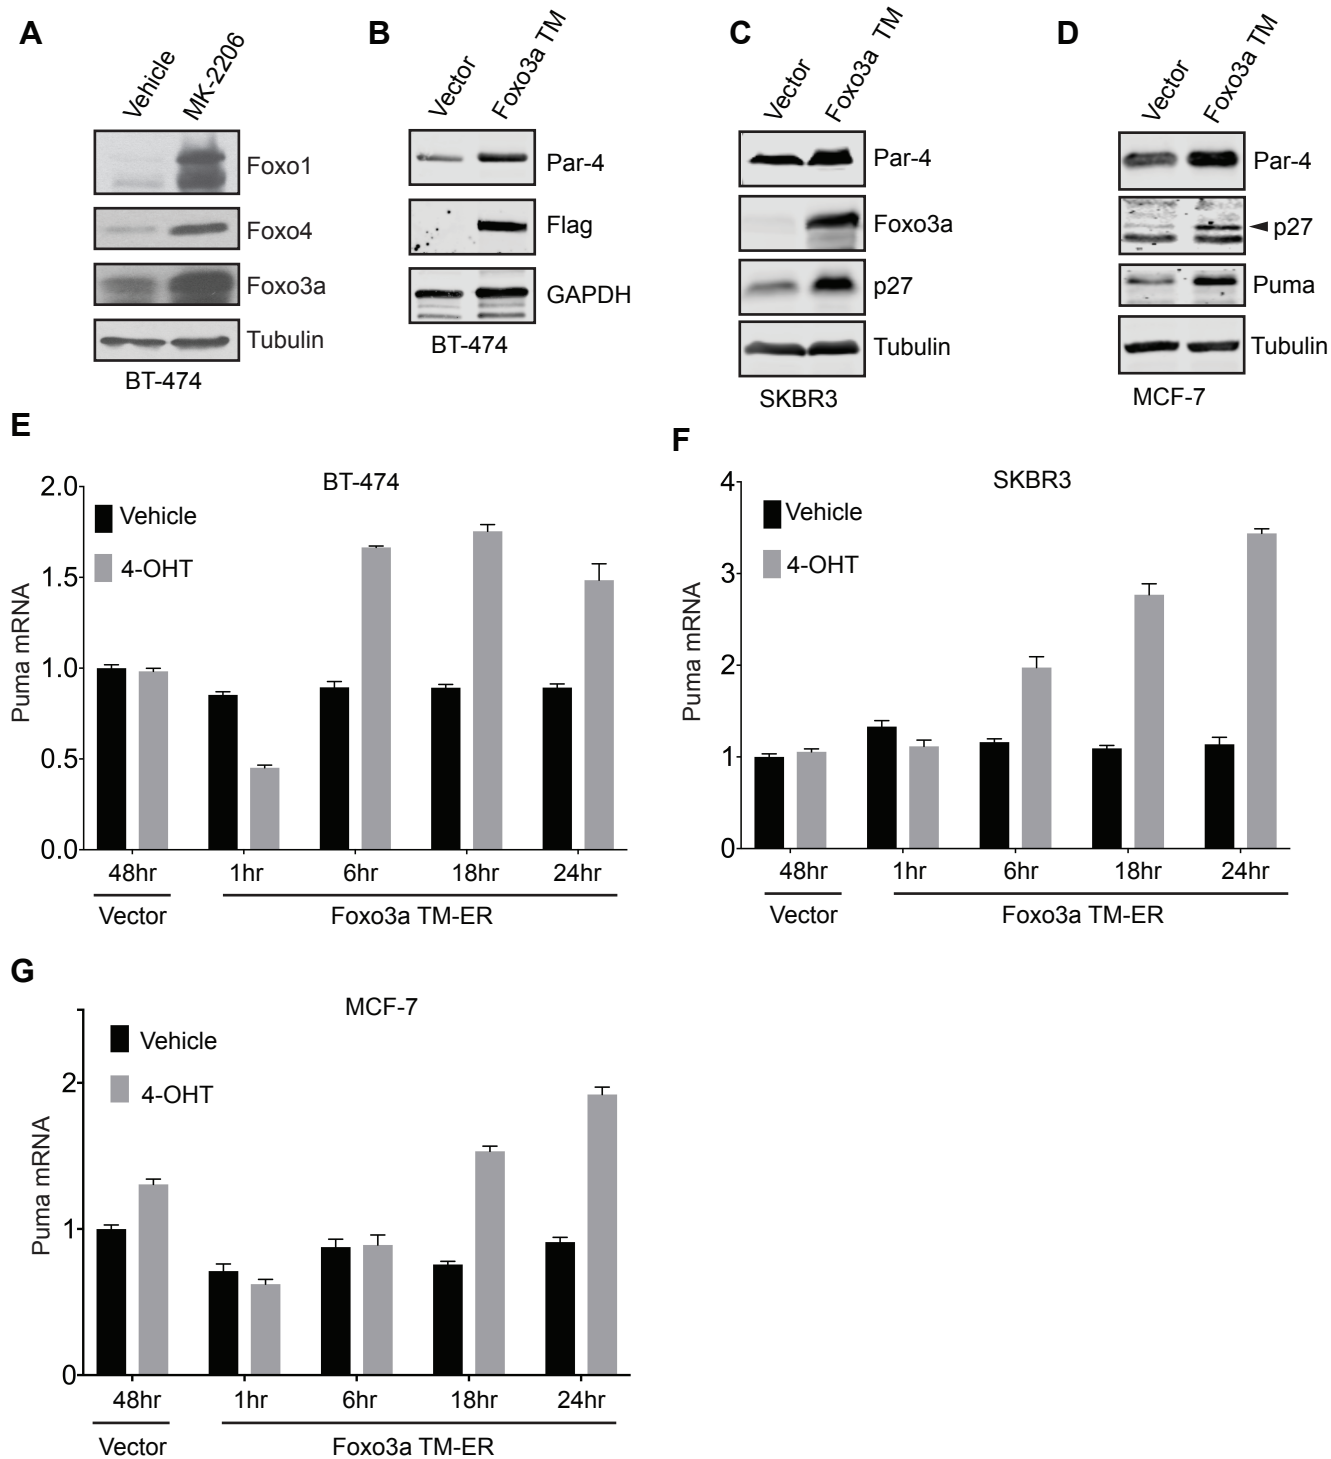

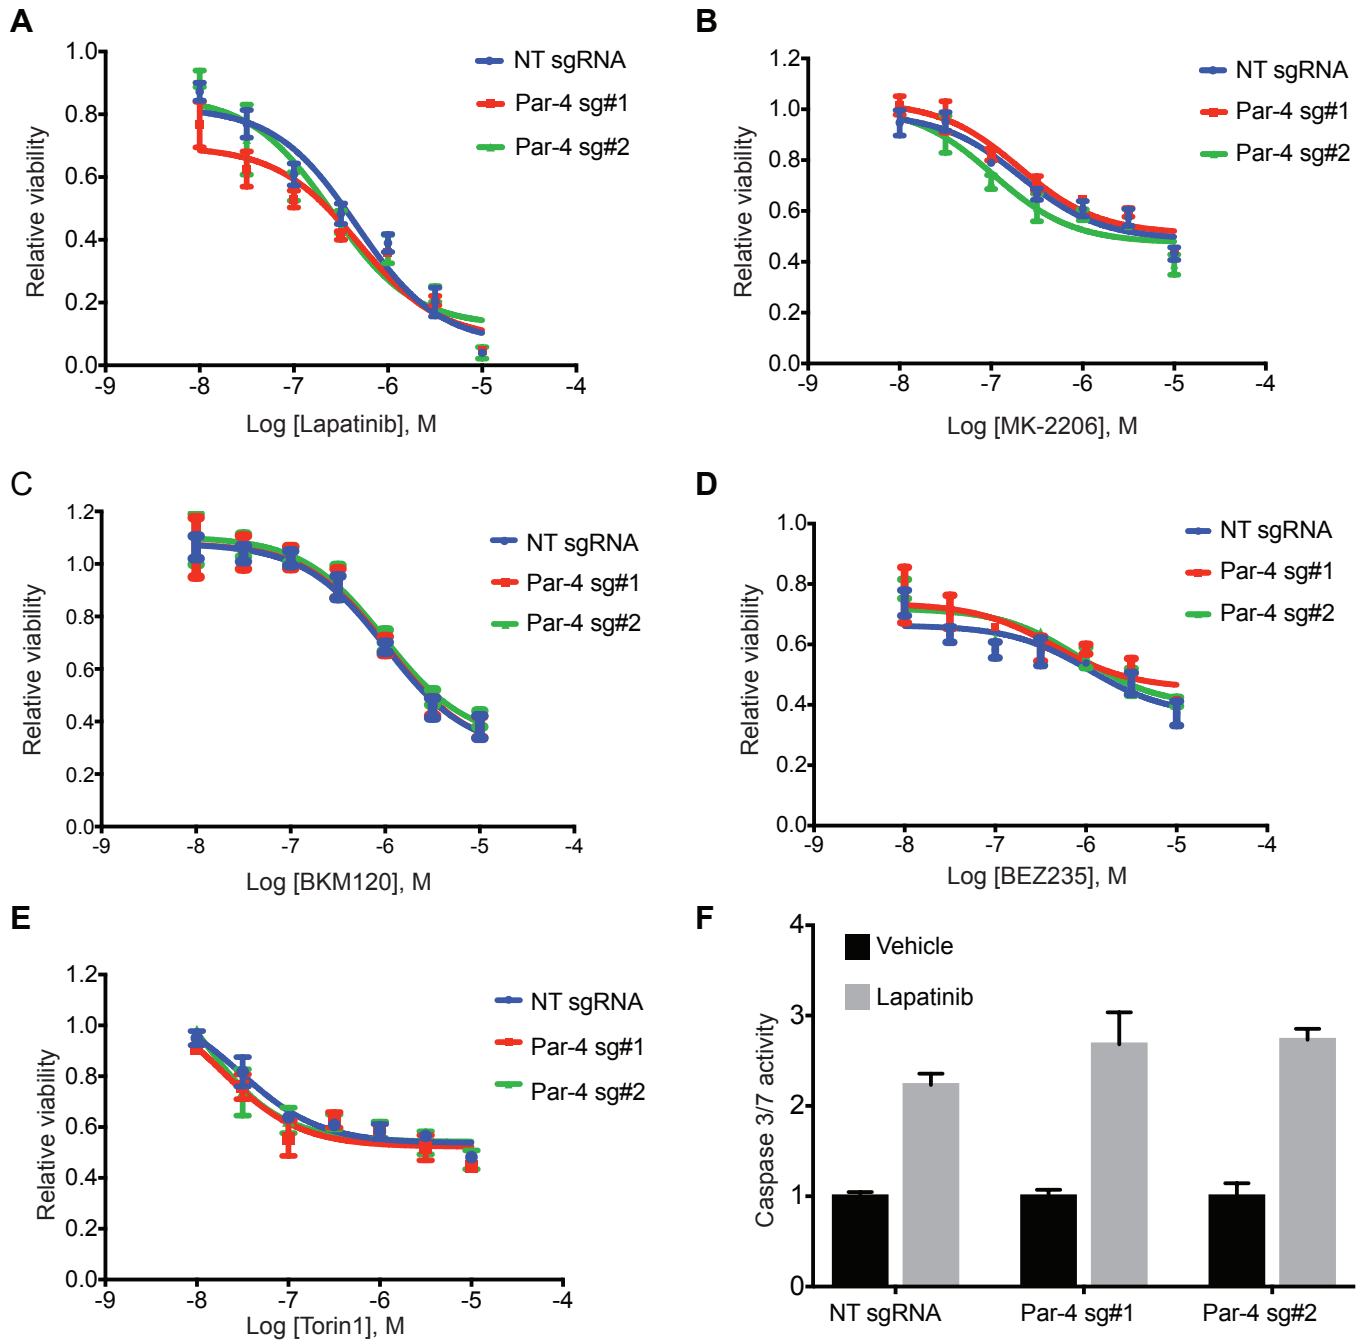

## **Supplemental Figure Legends**

**Supplemental Figure 1.** Par-4 is upregulated following inhibition of the PI3K-Akt-mTOR pathway but not the MEK pathway. A, Western blot analysis showing Par-4 expression in SKBR3 cells treated with the indicated drugs for 2 days. B, qPCR analysis showing Par-4 mRNA expression in SKBR3 cells treated with the indicated drugs for 2 days. C, Western blot analysis showing Par-4 expression in BT-474 cells treated with the indicated drugs for 2 days. D, qPCR analysis showing Par-4 mRNA expression in BT-474 cells treated with the indicated drugs for 2 days.

**Supplemental Figure 2.** Par-4 is a direct target of Foxo transcription factors. A, Western blot analysis of Foxo family members following Akt pathway inhibition in BT-474 cells. B-D, Western blot analysis of BT-474 (B), SKBR3 (C), and MCF-7 (D) cells transfected with Foxo3a<sup>TM</sup>. E-G, Time-course of Puma mRNA upregulation following 4-OH Tamoxifen treatment in BT-474 (E), SKBR3 (F), or MCF-7 (G) cells stably expressing Foxo3a<sup>TM</sup>-ER fusion.

**Supplemental Figure 3.** Par-4 expression does not affect the acute survival of cells following Her2-PI3K-Akt pathway inhibition. A-E, Dose-response curves showing cell viability of control and Par-4 knockout cells following treatment with the indicated drugs for three days. F, Caspase-Glo assay showing caspase-3/7 activity following three days of Lapatinib treatment in control and Par-4 knockout cells.

Supplemental Table 1.

| Primers for cloning par-4 promoter |                                       |                                          |
|------------------------------------|---------------------------------------|------------------------------------------|
|                                    | Forward                               | Reverse                                  |
| Region #1                          | 5'-TAACGGTACCGGAGCAGCGACTAGGAAAAG-3'  | 5'-TAACAAGCTTCAGGCAATCCCAGGACAG-3'       |
| Region #2                          | 5'-TAACGGTACCTGTAGCCTCCCACAATGATG-3'  | 5'-TAACAAGCTTAGAAAGTCTCGAACGCTGCT-3'     |
| Region #3                          | 5'-TAACGGTACCTGCCAAGATCTCTCAGCTA-3'   | 5'-TAACCTCGAGCTGACGCACCTAAGACTGACC-3'    |
| Region #4                          | 5'-TAACGGTACCGCAGCCAAAATTCTGACTCA-3'  | 5'-TAACAAGCTTTAAGGGAGGCTGGGACATTA-3'     |
| Region #5                          | 5'-TAACGGTACCTTCTTCTCCCTCCCTCCTGT-3'  | 5'-TAACAAGCTTGGGCTGAGGTGAAAGACAAA-3'     |
| Region #6                          | 5'-TAACGGTACCGGGTCAATCCTCTCTCCTC-3'   | 5'-TAACAAGCTTGCTTCTCTCTCGATCTGC-3'       |
| Region #7                          | 5'-TAACGGTACCCAACGAGCTCAACAACAACCT-3' | 5'-TAACAAGCTTGAGCCATAAGTTGTCTTTCTACCA-3' |
| Region #8                          | 5'-TAACGGTACCACACGTGCTTTTCAGGCTTC-3'  | 5'-TAACAAGCTTAACGTTTCGAAAATGCTCCA-3'     |
|                                    |                                       |                                          |
| Primers for ChIP                   |                                       |                                          |
|                                    | Forward                               | Reverse                                  |
| Region #3                          | 5'-ATGTGCTACCTGGGCAAAC-3'             | 5'-GAGGCTACAAATGCCAGGTC-3'               |
| Region #6                          | 5'-CAGGAAGGAAGAGGAGGCA-3'             | 5'-CTCCTCCAGGAAGTCTGTGG-3'               |
| Region #8                          | 5'-GGGATGATTTAGTAACCCACAA-3'          | 5'-TGCAAACAACCCAAAACAAA-3'               |
| Distal region (~10 kb upstream)    | 5'-TTCTAAGCAGTGCAGGAGCA-3'            | 5'-TCTGATGACTCGCCCTCTTT-3'               |
|                                    |                                       |                                          |
